# Supplementary material for: Structural insights into ribosomal rescue by Dom34 and Hbs1 at near-atomic resolution
Source: PubMed Central journal article supplement (PMC5187420; doi:10.1038/ncomms13521), 2016-12-20
Supplement: ncomms13521-s1.pdf [file ncomms13521-s1.pdf]

## Supplementary Material

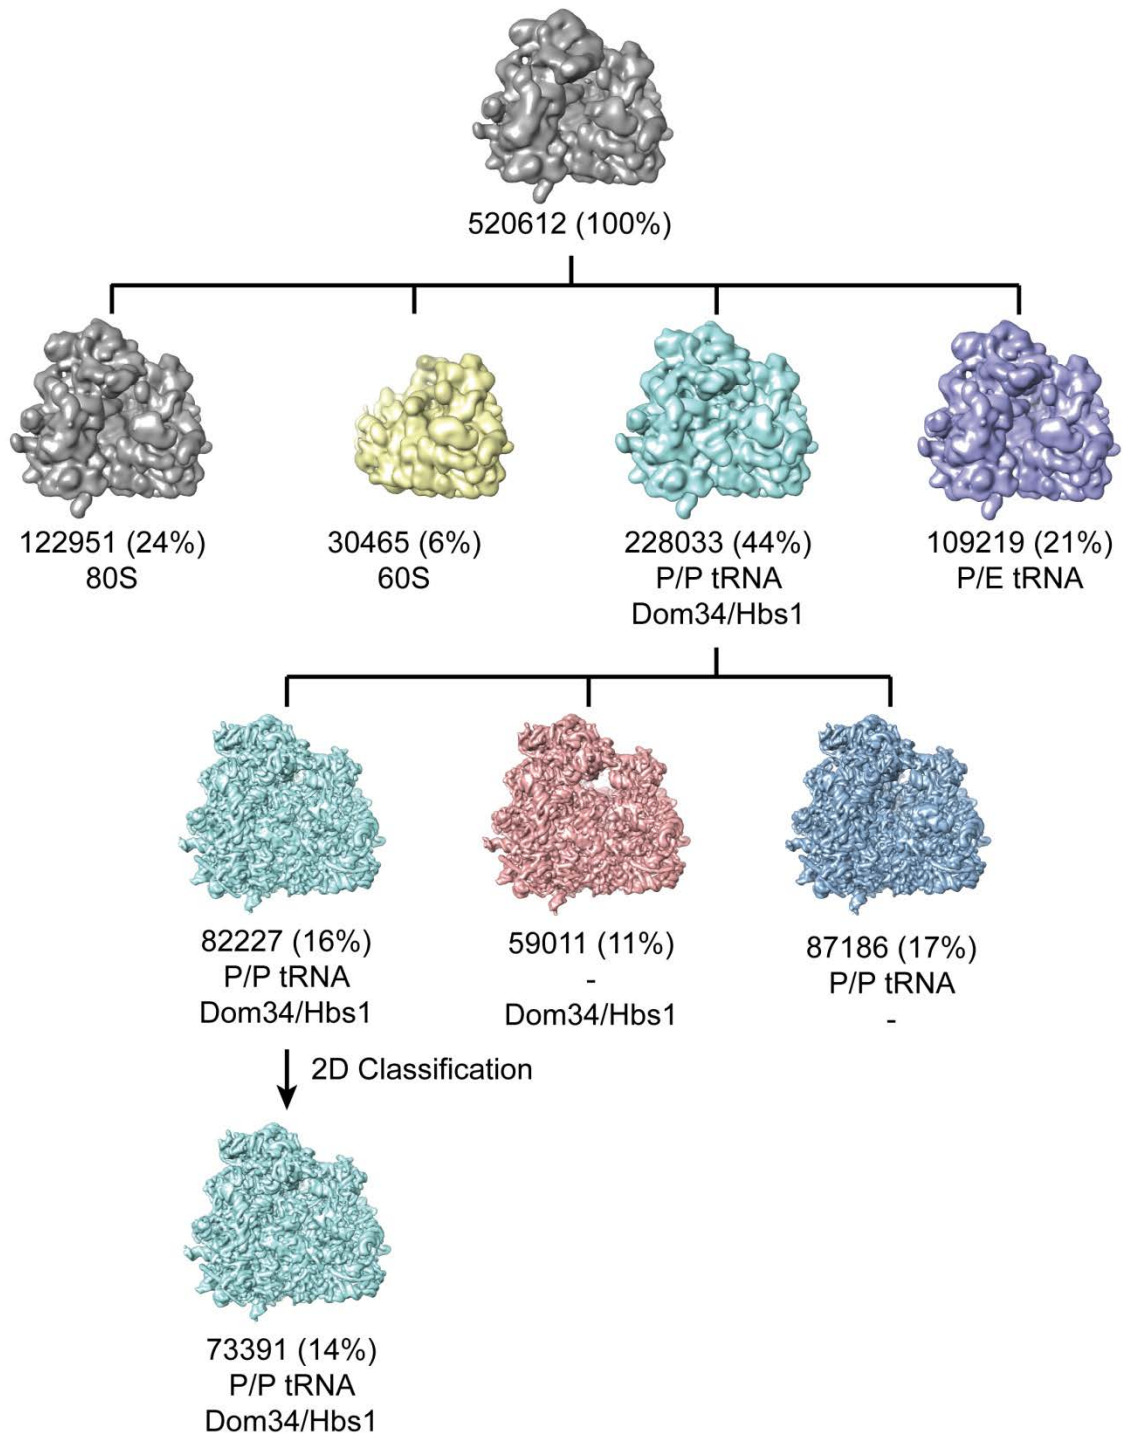

### Supplementary Figure 1: *In silico* sorting scheme of the nonstop ribosomal complex.

After several iterations of refinement with SPIDER a homogeneous population of 82,227 particles was obtained containing all desired components. Subsequently, RELION was used for final clearance of the dataset by 2D classification.

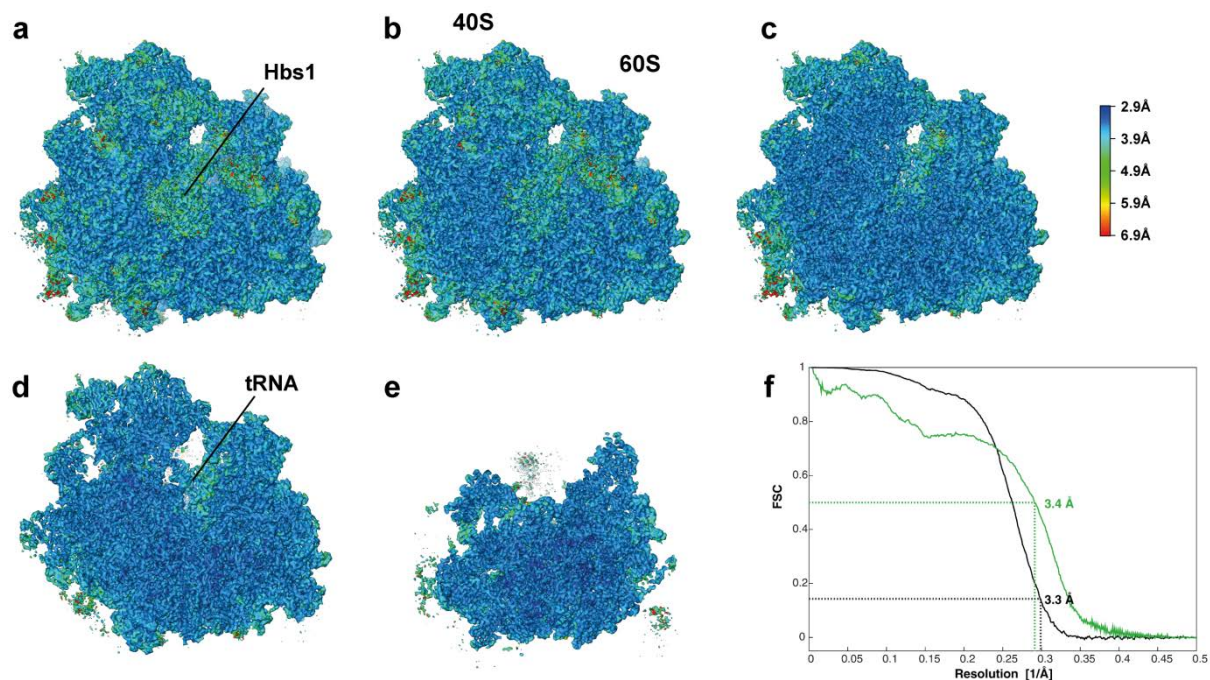

**Supplementary Figure 2: resolution measures of the nonstop ribosomal complex.** (a-e) represent slices through the density map, colored by the local resolution estimated with ResMap. 40S and 60S subunits are resolved equally well, with a resolution better than 3 Å in the core. Flexible regions, especially at the periphery are less well resolved. (f) overall resolution determined by the FSC of two half-maps (black) or by cross-correlation of the refined atomic model with the density map (green).

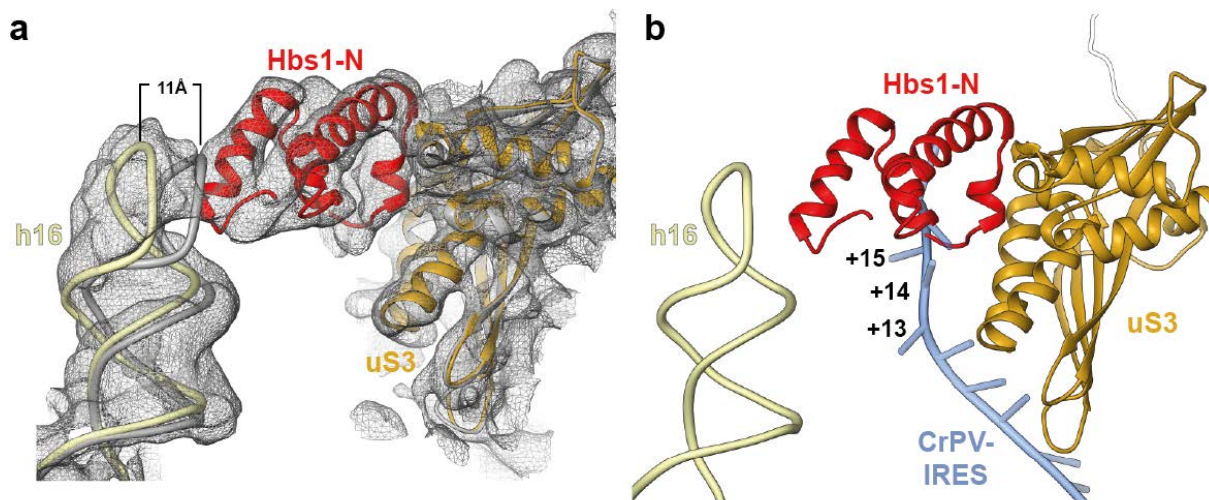

**Supplementary Figure 3: The N-terminal domain of Hbs1 helps substrate recognition.**

(a) The electron density map surrounding the mRNA entry channel in the nonstop ribosomal complex (NsRC) is shown filtered to 5 Å. Hbs1-N (red) is placed between h16 (yellow) and uS3 (gold). The tip of h16 is displaced by 11 Å compared to the position in the vacant ribosome (grey). (b) Superposition of the CrPV-IRES (blue) from the related ribosomal termination complex<sup>1</sup> into our NsRC illustrates that the binding position of Hbs1-N overlaps with downstream nucleotides of long mRNAs. It seems likely that Hbs1-N competes with mRNAs extending the P-site for binding on the mRNA entry site starting with the nucleotides in position +14.

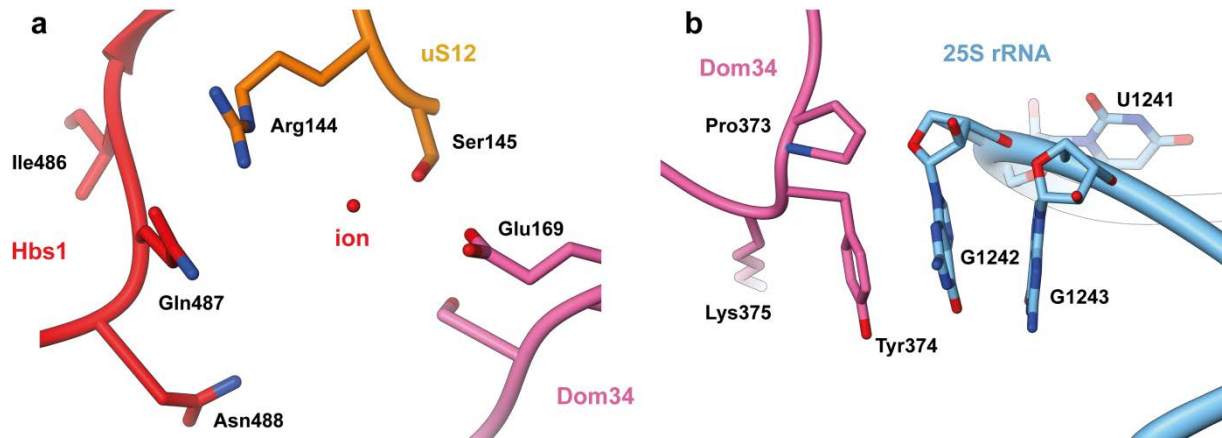

**Supplementary Figure 4: Selected interactions of the rescue factors with the ribosome**

(a) Gln487 of Hbs1 (red) and Glu169 of Dom34 (hot pink) are not in contacting distance. Arg144/Ser145 of the ribosomal protein uS12 (orange) are in proximity and mediate the interaction between the rescue factors via an coordinated ion. (b) Tyr374 of Dom34 (hot pink) is stacking on G1242 of the 25S rRNA (blue) forming a close contact to the ribosomal 60S subunit.

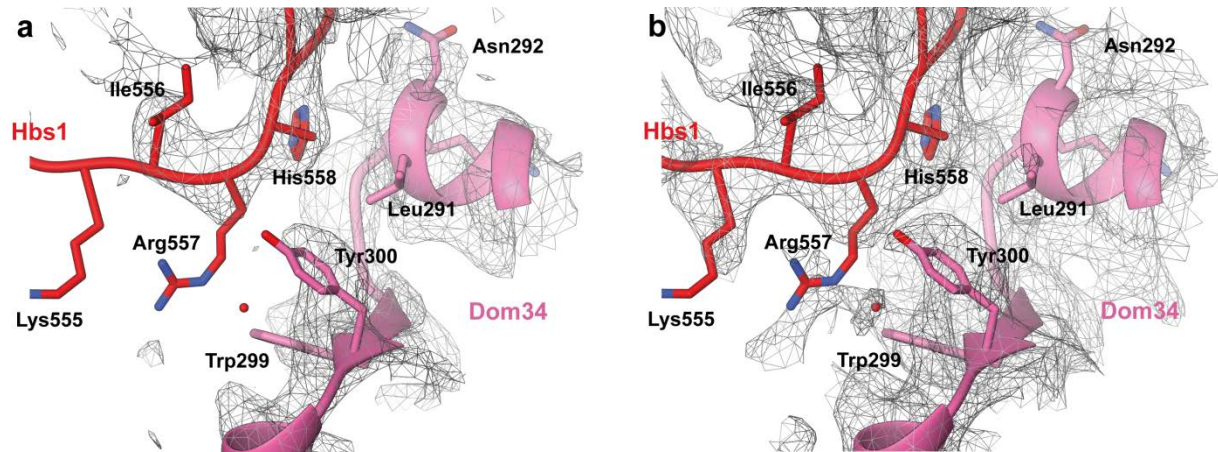

**Supplementary Figure 5: Surrounding of the conserved Tyr300 at different contour levels (a)** Tyr300 of Dom34 (hot pink) is pointing towards Hbs1 (red). The displayed contour level is 3. **(b)** Contour level of 2. Density for some side chains becomes more visible, e.g. Lys555 of Hbs1.

## Supplementary Table 1: Data collection, refinement and validation

### Data collection

|                                                  |          |
|--------------------------------------------------|----------|
| Particles                                        | 73391    |
| Pixel size (Å)                                   | 0.994    |
| Defocus range (µm)                               | -0.5-4.5 |
| Voltage (kV)                                     | 300      |
| Electron dose (e <sup>-</sup> /Å <sup>-2</sup> ) | 25       |
| Resolution (Å, FSC 0.143)                        | 3.3      |

### Model composition

|                  |       |
|------------------|-------|
| Protein residues | 13128 |
| RNA residues     | 5444  |

### Model refinement

|                |   |
|----------------|---|
| Applied weight | 1 |
|----------------|---|

### Protein

|                           |      |
|---------------------------|------|
| RMS deviation             |      |
| Bond lengths (Å)          | 0.01 |
| Bond angles (°)           | 0.07 |
| Ramachandran favored (%)  | 93   |
| Ramachandran outliers (%) | 0.13 |
| Rotamer outliers (%)      | 0.01 |

### RNA

|                                 |      |
|---------------------------------|------|
| Correct sugar puckers (%)       | 98.6 |
| Good backbone conformations (%) | 82.4 |

|                   |            |
|-------------------|------------|
| <b>Clashscore</b> | <b>3.7</b> |
|-------------------|------------|
